# Supplementary material for: Liver- and Microbiome-derived Bile Acids Accumulate in Human Breast Tumors and Inhibit Growth and Improve Patient Survival
Source: Oxford University Press journal article supplement (doi:10.1158/1078-0432.ccr-19-0094), 2019-07-11
Supplement: 10780432ccr190094-sup-215140_2_supp_5602938_ptkmcb.xlsx [file 10780432ccr190094-sup-215140_2_supp_5602938_ptkmcb.xlsx]

## Sheet: Supplementary Table 3
Supplementary Table 3: Altered gene expression in the Steroid Biosynthesis pathway in deoxycholate-treated T47D cells
								n=3			n=3			n=3
Gene	Symbol	log2FoldChange (DC20 vs mock)	P value (DC20 vs mock)	log2FoldChange (DC50 vs mock)	P value (DC50 vs mock)	log2FoldChange (treatment_dosage)	P value (treatment_dosage)	mockA.counts	mockB.counts	mockC.counts	DC20A.counts	DC20B.counts	DC20C.counts	DC50A.counts	DC50B.counts	DC50C.counts
ENSG00000170835.10	CEL	-0.972507	0.0903807	-0.348628	0.485426	-0.00599199	0.546676	12	20	11	5	8	8	10	10	13
ENSG00000147155.6	EBP	-0.161787	0.0345663	-0.0309792	0.684706	-0.000218018	0.898769	1080	1105	1085	1051	962	934	1057	1035	1102
ENSG00000149809.10	TM7SF2	0.165	0.063487	0.148165	0.167156	0.00275194	0.240471	1677	1362	1321	1740	1527	1658	1499	1445	1877
ENSG00000057252.8	SOAT1	0.139303	0.0923498	0.162195	0.0704746	0.00312092	0.0706615	761	814	851	837	936	921	941	950	823
ENSG00000186104.6	CYP2R1	0.0131046	0.901996	0.154726	0.144153	0.00326628	0.0712953	336	344	333	338	351	339	385	377	364
ENSG00000109929.5	SC5D	0.0826115	0.315474	0.171861	0.0472708	0.0034715	0.0535055	1285	1370	1507	1388	1627	1426	1692	1557	1436
ENSG00000147383.6	NSDHL	-0.0515273	0.653134	0.160707	0.16235	0.00354939	0.102044	393	310	342	346	329	342	365	405	395
ENSG00000111012.5	CYP27B1	-0.0851072	0.670142	0.173858	0.384783	0.00391191	0.293125	93	83	84	91	83	73	85	86	121
ENSG00000079459.8	FDFT1	0.217212	7.12e-05	0.374919	4.28e-10	0.00738528	1.13e-12	4083	3963	4181	4799	4815	4712	5282	5313	5238
ENSG00000116133.7	DHCR24	0.391437	6.67e-12	0.426586	7.71e-11	0.00797326	3.89e-05	7007	7446	7209	9626	9903	9108	9489	9271	10309
ENSG00000132196.9	HSD17B7	0.0286866	0.852949	0.40298	0.00416572	0.0084678	0.00123758	146	151	156	139	148	178	207	195	197
ENSG00000160285.10	LSS	0.0327031	0.679282	0.414994	3.02e-05	0.00871247	5.23e-05	950	875	869	972	912	893	1289	1003	1293
ENSG00000001630.11	CYP51A1	0.672335	0.0343845	0.520554	0.100405	0.0089701	0.154346	31	34	21	49	31	59	31	38	53
ENSG00000104549.7	SQLE	0.178253	0.0117754	0.460848	4.55e-10	0.00929736	1.04e-13	1190	1245	1302	1440	1440	1383	1722	1757	1658
ENSG00000052802.8	MSMO1	0.356193	8.48e-05	0.63655	9.24e-14	0.0124979	5.64e-13	565	594	581	824	693	728	885	942	874
ENSG00000172893.11	DHCR7	0.480512	1.51e-09	0.706157	4.26e-16	0.0136192	2.08e-09	1845	1956	1706	2861	2485	2397	2881	2731	3355
